# Sex-specific variation in the use of vertical habitat by a resident Antarctic top predator

Theoni Photopoulou<sup>\*,1,2</sup>, Karine Heerah<sup>3</sup>, Jennifer Pohle<sup>4</sup>, and Lars Boehme<sup>1</sup>

<sup>1</sup>Sea Mammal Research Unit, Scottish Oceans Institute, University of St Andrews, St Andrews, UK

<sup>2</sup>Centre for Research into Ecological and Environmental Modelling, University of St Andrews, St Andrews, UK

<sup>3</sup>Marine Bioacoustics Lab, Zoophysiology, Dept. Biology, Aarhus University, Aarhus, Denmark

<sup>4</sup>Department of Business Administration and Economics, Bielefeld University, Bielefeld, Germany

\*Corresponding author: [theoni.photopoulou@gmail.com](mailto:theoni.photopoulou@gmail.com)

## 1 Abstract

Patterns of habitat use are commonly studied in horizontal space, but this does not capture the four-dimensional nature of ocean habitats. There is strong seasonal variation in vertical ocean structuring, particularly at the poles, and deep-diving marine animals encounter a range of oceanographic conditions. We use hidden Markov models fitted to telemetry data from an air-breathing top predator to identify different diving behaviours and understand usage patterns of vertically distributed habitat. We show that preference for oceanographic conditions in the Weddell Sea, Antarctica, varies by sex in Weddell seals, and present the first evidence that both sexes use high-density, continental shelf water masses. Males spend more time in the colder, unique high-salinity shelf water masses found at depth, while females also venture off the continental shelf and visit warmer, shallower pelagic water masses. Both sexes exhibit a diurnal pattern in diving behaviour that persists from austral autumn into winter. These findings provide insights into the Weddell Sea shelf and open ocean ecosystem from a top predator perspective. The differences in habitat use in a resident, sexually monomorphic Antarctic top predator suggest a different set of needs and constraints operating at the intraspecific level, which are not driven by body size.

Keywords: diving behaviour, water mass, continental shelf, Weddell seal, sex-specific variation, hidden Markov model

## 2 Background

Understanding what parts of an ecosystem are important for species is a cornerstone of ecological research. Important habitat is often detected by proxy; if a species regularly occurs in a habitat, it must fulfill a life-history function. For large marine vertebrates, occurrence is usually measured using location data from animal-attached instruments. However, identifying the drivers of marine population distributions from horizontal location data alone can be problematic for air-breathing deep-diving marine animals [1, 2]. This group spend most of their time underwater and are intrinsically difficult to observe. Depth is a fundamental dimension of their movement, and information is lost if dives are not considered. Vertical structuring of ocean habitats can enhance productivity and create predictable concentrations of resources (e.g., [3, 4, 5]). Deep-divers can benefit from this increased prey density at steep physical gradients [6, 7, 8, 9, 10, 11, 12, 13] and track its seasonality [14], which is especially strong at the poles (e.g., [15]). For most species of deep-diving wide-ranging marine vertebrates, we do not have a detailed understanding of what prey they consume nor the structure and functioning of the ecosystems that support them.

For air-breathing divers like pinnipeds, seabirds and cetaceans, dives are the result of the separation of two basic resources: air at the surface and prey resources at depth. Greater depths are more costly from a time-budget perspective, since transit likely excludes foraging [16], and physiologically more costly [17, 18, 19], due to the metabolic requirements of hunting and digestion. It follows that the habitat at these depth layers is expected to be profitable in terms of prey resources ([16], but also [20, 21]).

Understanding the environmental context of diving is key to linking behaviour to habitat and prey. Recent examples of integrative multi-species studies that describe the spatial distribution of different marine animal guilds include [22, 23, 24, 25]. However, surface variables do not reflect conditions at depth [26], and the methodology for relating diving behaviour to depth-varying environmental variables is underdeveloped in comparison. The collection of behavioural and *in situ* environmental data by satellite-linked animal-borne devices [27, 28] is a way of filling this data-gap and allows us to relate depth-varying behaviour to depth-varying conditions. In this study we characterise the relationship between diving behaviour and seawater density regimes (temperature and salinity) in a sexually monomorphic Antarctic top predator, the Weddell seal (*Leptonychotes weddellii*), in its namesake shelf sea. We examine sex-specific differences, as well as seasonal and diurnal trends, to understand intraspecific partitioning of resources. Although this is a single-species study, the approach

can be used equally effectively for multi-species data. Incorporating diving animals' use of depth is critical for making good predictions of future distributions (e.g., [29, 30]).

The southern Weddell Sea is a large embayment in the Atlantic sector of the Southern Ocean. It stands out among Antarctica's shelf seas with a wide continental shelf and extensive winter sea ice production, which leads to the formation of high-salinity water. This creates a unique environmental context. Weddell Sea hydrography has been the focus of intense research to understand the mechanisms that underpin the formation of globally important dense bottom water [15, 31, 32, 33]. Weddell seals occur all around the Antarctic coast and their diving behaviour has been studied since the earliest years of animal-borne instrument development [34, 35]. Due to higher accessibility, most of what we know about Weddell seal foraging ecology comes from East Antarctica. In these areas, seals seldom venture off the continental shelf where a much warmer and a little fresher water mass - modified Circumpolar Deep Water - plays a central role [36, 37]. In contrast, the southern Weddell Sea is only accessible by ship during the austral summer and seals largely occur on sea ice. The interaction of Weddell seals with the hydrographically complex and varied Weddell Sea vertical habitat is not currently understood (but see [38, 39, 40]) and is likely to be different, owing to the availability of different water masses and deep ocean habitat. Previous work on foraging ecology in the Weddell Sea has found that dives target the surface, shallow epipelagic, and the mesopelagic region [38, 41, 42, 43], while commuting through intermediate depths. Although some pioneering work has been done to find out what occurs at these depths [38, 41, 42], knowledge of Weddell Sea shelf ecosystem remains poor.

The high degree of serial correlation in animal movement metrics makes it necessary to use analytical approaches that account for it. Hidden Markov models (HMMs) [44, 45] are time series models, which allow us to learn about the underlying process from multivariate observations (multiple data streams). They have been used to model diving data from several marine predators and are powerful for making inferences about complex temporal patterns and responses to environmental features [46, 47, 48, 49, 50]. We use HMMs to identify Weddell seal dive types and the effect of temporal covariates on the probability of switching between vertical movement states. Geographical differences in female and male diving activity [51] suggest that the two sexes may dive to different depths and use different water masses. We identify the depth at which seals spend time hunting and link hunting activity to *in situ* oceanographic conditions, making this the first study to examine sex differences in the relationship between at-depth environmental conditions and foraging in this circumpolar resident top predator in the southern Weddell Sea.

## 3 Methods

### 3.1 Data collection

Behaviour and oceanographic data were collected using telemetry instruments attached to the fur of adult Weddell seals in the southern Weddell Sea, Antarctica, after their annual molt. We used Conductivity-Temperature-Depth Satellite Relay Data Loggers (CTD-SRDLs) [52, 53], designed and manufactured by the Sea Mammal Research Unit Instrumentation Group (SMRU-IG), St Andrews, Scotland, UK. CTD-SRDLs employ the CLS Argos satellite system to relay data [54]. This produced a dataset from 19 Weddell seals (10 females, 9 males) instrumented in mid-February 2011 (Fig 1), as part of an oceanographic research program [15, 55]. This is the largest single-year telemetry dataset from this species in the Weddell Sea.

A detailed description of the deployment technique and individual deployment data are presented in [56] and [51]. Dive data were collected using algorithms developed for high-latitude, deep-diving

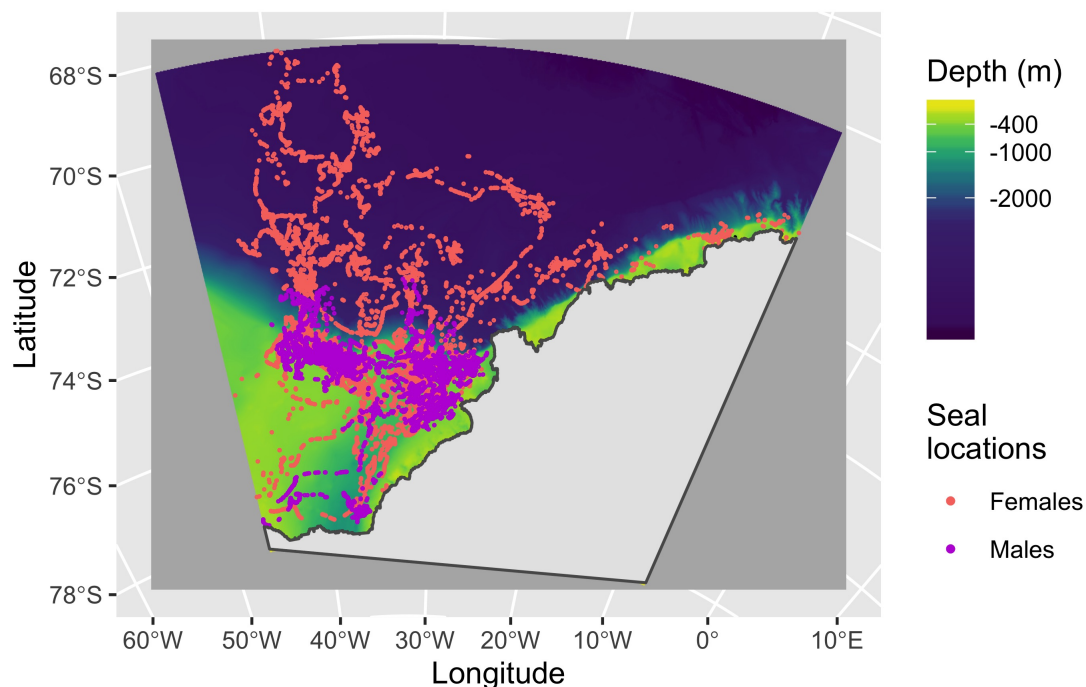

Figure 1: Satellite tracks from 19 instrumented Weddell seals carrying CTD-SRDL tags deployed in February 2011. The tracks are colour-coded by sex. The background colour represents the bathymetry (depth in metres at a 0.5km resolution). The colour bar has been scaled so that yellow areas represent the continental shelf and dark blue areas represent the deep ocean. There is a deep trough on the continental shelf at 40°W called the Filchner Depression. These are predicted locations from a correlated random walk model fitted to the original data, accounting for the estimated location error provided by CLS Argos, using the `foieGras` package in R [57].



seals [52, 53, 58], and CTD data were collected, calibrated and processed according to the MEOP (Marine Mammals Exploring the Oceans Pole to Pole) consortium standards [27]. A summary of the data is presented in Supplementary Material S1.

## 3.2 Data processing

We consider a near-complete sequence of behaviour by combining the haulout, surface and dive information returned by the tag (for definitions see Supplementary Material S1). We do not consider short surface intervals between these events. We found that the amount of data reduces substantially after week 24 (13-19 June 2011) so we only consider data up to 19 June.

We calculated hunting depth and time spent hunting during dives using methods developed by [21]. Heerah *et al.* [21] used high-resolution time-depth data and triaxial accelerometer data from Weddell seals to detect prey capture attempts (PrCAs) and found a strong correlation between vertical sinuosity, swimming speed and the number of prey capture attempts. We use their estimated vertical speed threshold (0.5m/sec) to extract segments of dives with low vertical speeds (hunting segments) and calculate the total duration of time spent in “hunting” mode in each dive ([10] and Supplementary Material S2). We use the depth of the longest hunting segment, where most PrCAs occur, as the hunting depth in our analyses (Supplementary Material S2).

There is a small number of dives that have no hunting according to the vertical speed threshold (508 out of 20662 dives, 2.5%). In these cases the hunting-specific variables (e.g., depth and proportion of dive time spent hunting) have missing values.

Only some dive profiles have a simultaneous CTD profile. To overcome this, we interpolated variables linearly in time, between time points where CTD data were available, and assigned them to the intervening dive times (Supplementary Material S3.1). We extracted bathymetry at the location of each seal dive after correcting the tracks using a model-based approach (Supplementary Material S3.2).

## 3.3 Statistical analysis

We are primarily interested in describing diving behaviour, which includes foraging, so we consider the underlying movement state as known for haulouts and surface events. We allow additional states to describe different diving behaviours. It was obvious from exploratory data analysis that female and male seals display different movement modes, which are differently affected by covariates, and therefore war-

129 rant separate models. We use behavioural and environmental variables from each behavioural record  
130 to derive five data streams (state-dependent variables) to be modelled using a multivariate HMM.  
131 The state-dependent variables are 1) behaviour duration (sec), 2) hunting depth (m), 3) proportion  
132 of dive duration spent hunting (hunting time/duration: 0-1), 4) proportion of bathymetry reached at  
133 hunting depth (hunting depth/bathymetry: 0-1) (see Supplementary Material S3.3), and 5) salinity  
134 (psu) at hunting depth. Only behaviour duration is meaningful for non-dive behaviours, so this is the  
135 only state-dependent variable that contributes to the estimation of haulout and surface events. All  
136 state-dependent variables contribute to the estimation of dive states.

137 We fit two multivariate HMMs (females, males) to estimate underlying states in the time series of the  
138 five state-dependent variables, which are assumed to be contemporaneously conditionally independent  
139 given the states. We model behaviour duration and hunting depth using a gamma distribution for non-  
140 zero positive values, proportion of dive time spent hunting as a beta distribution for values between  
141 zero and one, proportion of bathymetry reached as a single probability between zero and one, and  
142 salinity as a normal distribution. Salinity values are strictly positive but far from zero, so parameters  
143 do not need to be bounded.

144 Based on exploratory data analysis and existing knowledge regarding Weddell seal diving behaviour  
145 [34, 59, 36, 40], we choose two covariates that act on the probability of transition between states. These  
146 include local time of day as a circular variable with two components, cosine and sine, and week of the  
147 year, as well as an interaction term between time of day and week. The model formulation (the state-  
148 dependent variables, the temporal covariates, and the way the covariates were included in the model)  
149 was chosen carefully, based on biological system knowledge, so we did not carry out covariate selection  
150 and the full model was used for both females and males (Supplementary Material S4).

151 We include the time series of salinity in the state process rather than as a covariate on the transition  
152 probabilities. Our rationale is that we regard the hydrographic conditions encountered during a dive  
153 of a particular type, to be part of that movement behaviour, not an external factor influencing it.  
154 Weddell seals are long-lived, slowly reproducing large mammals with complex spatial memories. It  
155 seems unlikely that they respond mechanically to the abiotic conditions they encounter from one dive  
156 to the next. We initially included temperature as a covariate but removed it because we found a  
157 complete overlap of the state-dependent distributions, suggesting it is not useful for separating out the  
158 groupings in the data. We estimate the parameters of the state-dependent distributions, the covariate  
159 effects, and transition probabilities using numerical maximisation of the likelihood, implemented in

160 R [60], using the `nlm` function. The computation of the covariate-dependent transition probability  
161 matrices and the forward algorithm were coded in C++ (Supplementary Material S4).

162 We chose initial values empirically for each sex separately by looking at the distributions of the  
163 observed data, and used twenty sets of starting values to ensure the algorithm found a global maximum.  
164 We use the Viterbi algorithm to calculate the most likely state sequence for each individual.

## 165 4 Results

### 166 4.1 State-dependent distributions

167 The data from females and males were best described using different numbers of dive states. This  
168 resulted in a 5-state model for males and a 6-state model for females (Supplementary Material S4).  
169 In each case, the two non-diving states were provided as known states and dive states were estimated  
170 from the data (females: 4 dive states, males: 3).

171 The estimated state-dependent distributions displayed in Fig 2 show that female and male Weddell  
172 seals have three very similar vertical movement states. These are most easily thought of in terms of  
173 their hunting depth and proportion of bathymetry reached: 1) very short shallow dives, 2) slightly  
174 deeper dives in the epipelagic layer of the water column, and 3) deep dives with high probability of  
175 reaching the bottom, where they access high salinity water masses found only on the continental shelf  
176 (Table 1, Fig 2). Females also carry out a fourth dive type, in the pelagic layer of the water column.  
177 These dives are shorter than benthic dives and take place over the deep ocean, where the seals access  
178 lower salinity water masses (Table 1, Fig 2). In males, the pelagic dive state appears to be absent,  
179 although the epipelagic state is a bit deeper than in females. There was no compelling evidence of  
180 differences in proportion of time spent hunting between dive types or sexes.

181 Female and male deep dives are both benthic (Fig 2), with a 90% chance of reaching the bottom.  
182 This suggests that during these dives seals are targeting prey that occur near or at the bottom. The  
183 proportion of Viterbi decoded states differed between females and males (Table 1). Both sexes are  
184 equally likely to haul out and spend time at the surface, but males are almost twice as likely to carry  
185 out shallow dives (F: 17%, M: 31%) and benthic dives (F: 9%, M: 17%), while females are more likely to  
186 carry out epipelagic dives (F: 24%, M: 19%). Pelagic dives clearly make up a regularly used movement  
187 mode for females with 15% of records being estimated to belong to this state.

|                                  | Haulout events   | Surface events      | Shallow dives         | Epipelagic dives      | Pelagic dives         | Benthic dives         | Sex |
|----------------------------------|------------------|---------------------|-----------------------|-----------------------|-----------------------|-----------------------|-----|
| Duration                         | 2.8hrs (2.7-3.0) | 37.9min (36.4-39.5) | 1.0min (59-64sec)     | 7.4min (7.2-7.7)      | 14.1min (13.9-14.2)   | 19.0min (18.7-19.2)   | F   |
|                                  | 3.5hrs (3.3-3.7) | 34.3min (32.6-35.9) | 2.3min (2.2-2.4)      | 11.0min (10.7-11.3)   |                       | 18.2min (18.1-18.4)   | M   |
| Depth (m)                        |                  |                     | 8.8 (8.6-8.9)         | 38.5 (37.2-39.8)      | 193.8 (189.0-198.6)   | 413.1 (409.9-416.3)   | F   |
|                                  |                  |                     | 10.2 (10.1-10.4)      | 90.0 (86.8-93.2)      |                       | 411.8 (408.5-415.1)   | M   |
| Proportion of dive spent hunting |                  |                     | 0.51 (0.50-0.51)      | 0.55 (0.54-0.56)      | 0.49 (0.48-0.50)      | 0.43 (0.42-0.44)      | F   |
|                                  |                  |                     | 0.53 (0.52-0.53)      | 0.46 (0.46-0.47)      |                       | 0.42 (0.41-0.42)      | M   |
| Proportion of bathymetry reached |                  |                     | 0.00                  | 0.00                  | 0.00                  | 0.89 (0.72-1.00)      | F   |
|                                  |                  |                     | 0.00                  | 0.00                  |                       | 0.91 (0.77-1.00)      | M   |
| Salinity at depth (psu)          |                  |                     | 34.18 (34.178-34.192) | 34.29 (34.283-34.292) | 34.44 (34.433-34.444) | 34.61 (34.603-34.608) | F   |
|                                  |                  |                     | 34.23 (34.226-34.234) | 34.36 (34.351-34.360) |                       | 34.59 (34.591-34.598) | M   |
| State occupancy                  | 0.13 (0.10-0.17) | 0.21 (0.18-0.28)    | 0.17 (0.12-0.23)      | 0.24 (0.14-0.36)      | 0.15 (0.07-0.30)      | 0.09 (0.01-0.26)      | F   |
|                                  | 0.13 (0.10-0.17) | 0.20 (0.12-0.26)    | 0.31 (0.09-0.42)      | 0.19 (0.12-0.31)      |                       | 0.17 (0.11-0.36)      | M   |

Table 1: Parameter estimates for state-dependent distributions for female and male Weddell seals, from the respective HMMs - 6 states for females and 5 states for males. The proportion state occupancy is calculated as a the proportion of observations labelled as each state. Note that there are 4 dive states for females to spread their activity over compared to 3 in males. This naturally leads to smaller proportions in the 6-state scenario. However, if all states occur equally often, the proportions would all be smaller, which we do not see.

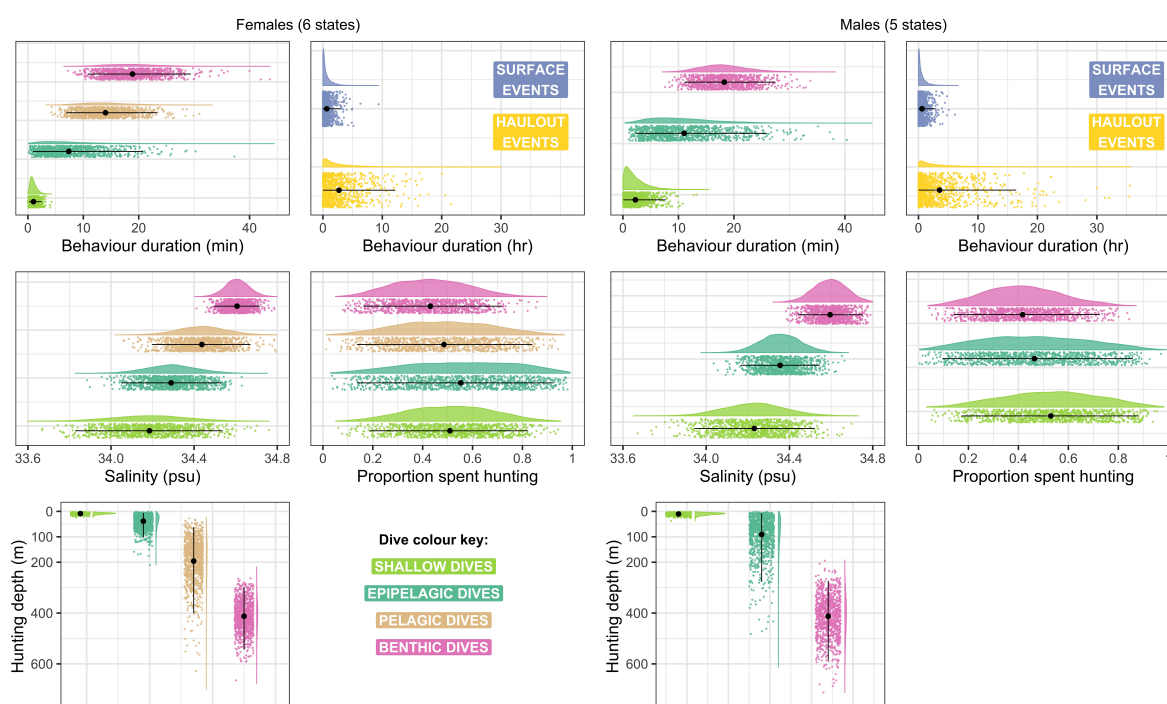

Figure 2: State density distributions for dive states (shallow, epipelagic, pelagic and benthic dives) and two non-dive states (haulout, surface) in female (left) and male (right) Weddell seals. The density distributions are colour-coded by state, with a cloud of points below them. The cloud represents a realisation of the estimated state-dependent distribution, based on a sample of 1000 points. The black point and line going through each coloured cloud of points represent the mean estimated by the model and the interval covering 95% of the probability mass. In females all 4 dive states are present, while in males there are 3 dive states (shallow, epipelagic and benthic).

188 We checked the model fit by 1) computing the pseudo-residuals for each of the state-dependent  
189 variables, and by 2) simulating data from the model and checking how well it matched the observed

190 data (Supplementary Material S5). There was no evidence of systematic lack of fit for either model.

## 191 4.2 Covariate effects

192 The distribution of state occupancy (i.e., the equilibrium probabilities as functions of covariates) is  
 193 shown in Fig 3 (females top, males bottom). These plots represent the probability (y-axis) of finding a  
 194 seal in a given state (columns), during a week of the year (rows) throughout the 24-hour cycle (x-axis).  
 195 The grey ribbon represents the area enclosed by the lower and upper confidence bounds of the 95%  
 196 interval of the estimated effect. We provide the state transition probabilities for the conditions shown  
 197 in Figure 3, in Supplementary Material S5.

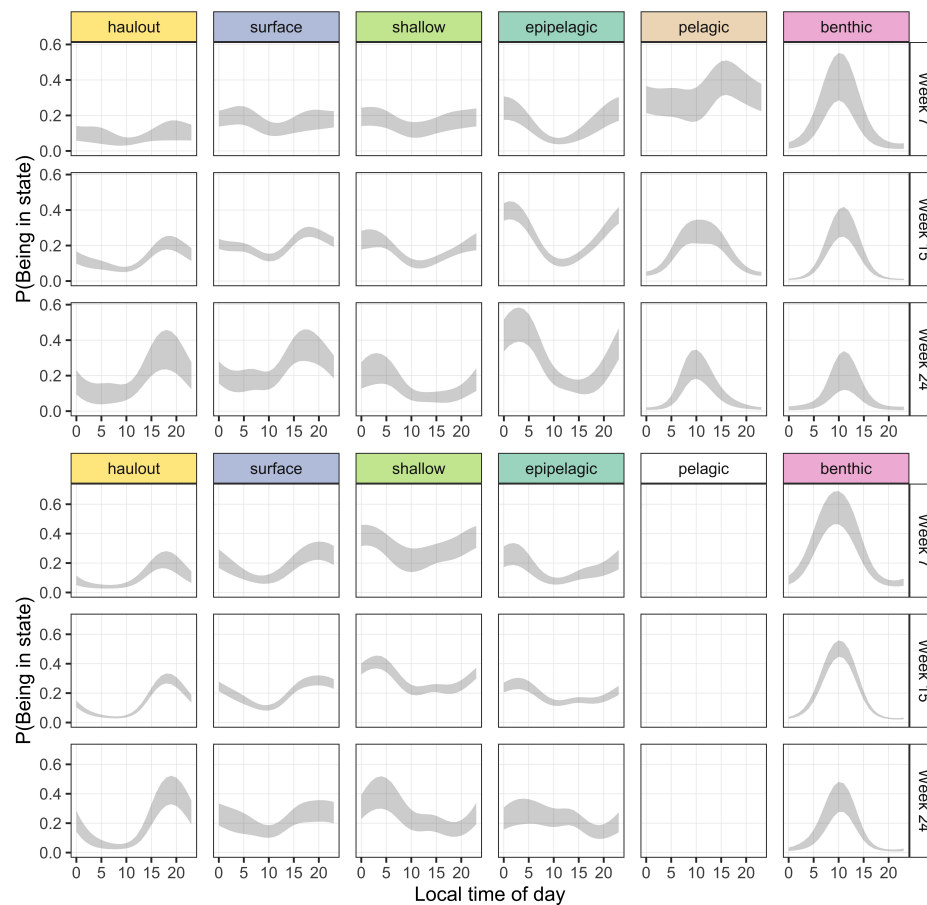

Figure 3: The probability (y-axis) of finding a seal in a given state (columns), during a week of the year (rows) throughout the 24-hour cycle (x-axis). The grey ribbon represents the area enclosed by the lower and upper confidence bounds of the 95% interval of the estimated effect, which were calculated using the delta method. Time of day corresponds to local time calculated from the location of each data point.

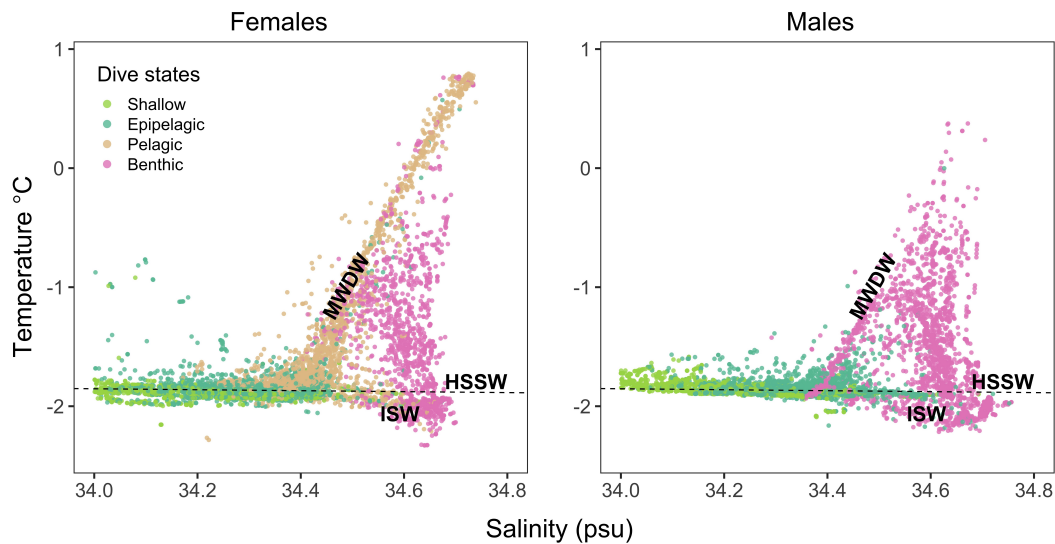

Figure 4: Temperature-salinity diagrams for dives from female and male seals coloured by Viterbi decoded state. The points in each plot correspond to the conditions encountered by seals at the hunting depth of each dive. The water mass labels correspond to High Salinity Shelf Water (HSSW), Ice Shelf Water (ISW) and Modified Warm Deep Water (MWDW). These labels are transcribed from Figure 3 of Nicholls *et al.* [31].

A seasonal effect is evident in female diving behaviour, particularly pelagic diving and benthic diving. Early in the year (week 7, late summer) pelagic dives are the most common movement mode, and occur throughout the day. Benthic dives are also common, but occur mainly in the day. By midwinter (week 24) deep dives are less common, replaced by nighttime epipelagic diving.

Male diving behaviour appears less seasonal. Benthic dives are dominant throughout the observation period and are most likely to occur around midday. Near midwinter, they become less dominant compared with other dive states, especially shallow dives.

The difference in oceanographic regimes used by female and male seals is clear in the temperature-salinity diagrams associated with their dive profiles. Although temperature was not included in the model we can still visualise the Viterbi decoded states in temperature-salinity (TS) space (Fig 4). The distribution of states in TS space is unsurprising for the shallower states (shallow, epipelagic dives) because there is a limited range of conditions that are found in these surface layers. However, the deeper states show a trend: females use Modified Warm Deep Water and Warm Deep Water extensively for pelagic dives. These water masses are found along the diagonal line seen in the female TS diagram. In contrast, males in this dataset almost never visited areas with at-depth water temperatures warmer than 0°C. The TS conditions associated with benthic dives are relatively consistent between females

and males. In both plots, Ice Shelf Water and High Salinity Shelf Water, as well as its interface with precursors to Modified Warm Deep Water, are visited regularly (see Figure 3 in [31] for water mass definitions).

## 5 Discussion

The aim of this study is to characterise diving behaviour and vertical habitats used by Weddell seals in the southern Weddell Sea. We do this by modelling the relationship between diving and seasonal environmental conditions in an integrative way, using HMMs. We find two movement strategies, that in our dataset correspond to sex-specific differences. Females and males have some overlap in diving behaviour, but there are also important differences. Males mainly carry out benthic deep dives, consistent with their spatial location on the continental shelf into winter (Fig 1). In contrast, female deep dives are both benthic and pelagic, consistent with their extensive off-shelf autumn and winter distribution. In both sexes, deep dives happen during the day, centered on local noon, (Fig 3). This pattern is present throughout the seasons represented in our dataset, even when there is little light at local noon. Both sexes use high-salinity shelf water masses throughout, from February to June. Regular visits to this unique and inaccessible vertical habitat - the coldest possible liquid water habitat at  $-2^{\circ}\text{C}$  - is worth the effort of carrying out deep dives, which have been found to be energetically costly [19]. Female diving behaviour follows a mixed seasonal pattern. In late summer, pelagic dives occur throughout the day, with a peak in the afternoon, while benthic dives are centered on midday. Near midwinter the dominant dive type is epipelagic diving. This is in contrast with the comparatively aseasonal diving behaviour of males.

Dive types represent different vertical habitat types. We found that male seals avoid the pelagic zone almost entirely. What does this suggest about the pelagic ecosystem on the southern Weddell Sea continental shelf? Dives down to the continental shelf benthos place the seal in some of the coldest, densest water in the world. Harcourt *et al.* [61] found that males that dived deeply during the breeding season lost weight slower than those that dived more shallowly. This is evidence that the prey resources accessed at depth are likely to be particularly profitable, hinting at the productivity of on-shelf Antarctic habitats [62]. The question then is, why do female seals leave the shelf and venture north? Perhaps due to over-crowding and density-dependent prey depletion, which females avoid by leaving the area. Another possible explanation is that the resources found off the continental shelf are as profitable, or even more so. Females can move north to exploit them at shallower, less energetically



costly depths, unhindered by the need to establish territories for the autumn. This pattern is similar to southern elephant seals from Isles Kerguelen, where the males commonly stay in the sea ice and forage on the Antarctic continental shelf while females move north as winter progresses and forage in the marginal ice zone [63]. The life history constraints that likely bring about this pattern for sexually dimorphic elephant seals are reversed for sexually monomorphic Weddell seals - the males are limited by the need to establish territories, keeping them in the south - not the females. In both cases, the marginal ice zone is clearly seasonally attractive for top predators.

The seasonality in female movement behaviour manifests both latitudinally and vertically. In late summer, females are most likely to be found diving pelagically throughout the day, and benthically at midday. This is in contrast to what has been found in East Antarctica (see [59] but also [36]). The hydrographic conditions associated with pelagic dives are compellingly clear: Modified Warm Deep Water, mixing with early Winter Water, and the continuum up the temperature gradient towards Warm Deep Water (Fig 4 and Fig 3 in Nicholls *et al.* [31] for reference). These conditions have consistently been shown to be profitable to female phocid seals (e.g., [7, 36, 30, 11, 26, 40]). What pelagic resources are females exploiting within the Weddell Sea Gyre? Sea ice has a high concentration of detritus and living organisms, which contribute to year-round biological productivity and community development, particularly under older ice floes [64]. This leads to a cascade of productivity, and may give rise to the prey base exploited during the two shallow dive types we found. The existence of multi-year sea ice in the Weddell Sea may be the critical factor that allows female Weddell seals to forage successfully (and haul out) away from the coast over deep water. The post-moult period finds female Weddell seals in need of replenishing their energy reserves after a period of reduced foraging due to lactation and the annual moult. A shallower pelagic diving strategy could afford the added energetic benefit of minimizing dive costs.

The lack of seasonality in male diving behaviour raises questions about the prey base they are exploiting. Hydrographically, the end of summer sees the beginning of a reduction in the inflow of warm water onto the continental shelf in the southern Weddell Sea [55]. Warm water enters the shelf as Modified Warm Deep Water in the region of the Filchner Depression, especially the eastern and western edges of the Filchner Sill (Fig 6 and 7 in Nicholls *et al.* [31] and Årthun *et al.* [55]). These physical changes must have some ecosystem effects but are not so great as to induce a discernible change in diving behaviour. However, a reduction in the probability of benthic dives and increase in epipelagic dives hint towards a shift in reliance towards surface layers in winter. Changes not detectable by our

approach include benthic prey type or prey behaviour. The TS diagram for males shows that some benthic dives occur in Modified Warm Deep Water (diagonal line starting at 34.4psu in Fig 4) but the clear majority of them occur in the denser, saltier water characteristic of sub-ice-shelf circulation and melting [65].

The shelf ecosystem that exists under these extreme temperature conditions is not well-studied, but is likely to experience a high degree of stability due to the narrow range of temperature and salinity conditions that can exist there [65]. It is known to support a large amount of biomass through Weddell seals and their likely prey, Antarctic toothfish (*Dissostichus mawsoni*) and other notothen fish (*Pleurogramma antarcticum*, *Trematomus loennbergii*). Stability and high biomass are attributes of mature ecosystems where large body size, narrow niche specialisation and long, complex life cycles are observed [66]. These attributes fit with what we know about the Weddell Sea continental shelf from a top predator perspective. Riotte-Lambert and Matthiopoulos [67] show that learning and memory are emergent properties of animals in a system with moderate-to-high environmental predictability. At slightly lower predictability, more social information use is favoured. Although the degree of social information exchange is not known for Weddell seals, they have a substantial underwater vocal repertoire known to function socially, at least in the breeding season. This would place the predictability of their environment on the mid-to-upper end of the scale (Fig 1 in [67]) at a time scale comparable with the lifetime of a Weddell seal. As non-migratory top predators, Weddell seals are likely to be instrumental in the stability of the Antarctic shelf ecosystem as a whole, forming a feedback loop between movement ecology and environmental predictability [67].

Historically, bottom trawls found high biomass at 600m on the southern slopes of the Filchner Depression was from notothen species (especially *D. mawsoni*, *P. antarcticum*, *T. loennbergii*) [62]. This is in contrast with the narrow eastern shelf where overall fish biomass was lower (Fig 3 in Ekau [62]), and which seals tend to avoid in our dataset. Over the Filchner Depression Antarctic toothfish were only caught in summer at 420-670m depth and dominated in terms of biomass, along with *T. loennbergii* and large specimens of Antarctic silverfish (*P. antarcticum*). The distribution and temporal availability of these high-biomass, large-bodied fish is highly consistent with the location and dive depth of Weddell seals on the shelf. In other parts of their range, Weddell seals have been found to mainly consume *P. antarcticum*, with seasonally varying contributions of larger prey such as *D. mawsoni* [68]. Goetz *et al.* [68] suggest that the proportional contribution of larger prey may increase with age. We do not have age information for the individuals tagged in this study, but it is possible that there is

306 further intraspecific niche separation beyond sexual segregation.

307 A diurnal dive pattern was observed early on in Ross Sea Weddell seals [34] and more recently in  
308 East Antarctica [36] and the Weddell Sea [40], with seals diving deeply in the day and shallowly at  
309 night. The shallow depths visited during nighttime are now known to overlap with the diel vertical  
310 migration of *P. antarcticum* [69, 36]. The depths and dive types described in [34, 70] correspond  
311 closely to the four dive states we identify for females. In agreement with previous studies, we find  
312 that epipelagic (<100m) dives are more likely at night [34, 71, 36, 40]. The daytime pelagic (<250m)  
313 female dives deviate from what we expected for pelagic diving behaviour based on other species (e.g.,  
314 southern elephant seals [7]). The pelagic ecosystem in the middle of the Weddell Sea Gyre is even less  
315 studied than the shelf benthos, but it seems likely that at these depths ( $\sim 200$ m) seals are foraging  
316 on some age class of *P. antarcticum* and other notothen species in the day, and moving shallower at  
317 night ( $\sim 50$ m).

318 The biological inferences we have drawn hinge on our analytical approach. The major advantages  
319 of HMMs for diving are that with them we can combine many aspects of diving behaviour and make  
320 inferences about possible behavioural classes in multiple dimensions, e.g., depth, duration, hunting be-  
321 haviour, distance from features, physiological state, etc. A drawback of HMMs based on data collected  
322 in the wild, without direct observations, is that we do not know how well our state interpretations  
323 correspond to reality. If we repeated the study, increasing the sample size, measuring physiological  
324 parameters relating to life stage or energetic status, relatedness, age and, of course, prey field, would  
325 help shed light on some of the unanswered questions. The need for information on prey field, prey  
326 type and prey profitability is also raised by the lack of signal in the proportion of time spent hunting.

## 327 6 Conclusion

328 In this study we show that Weddell Sea Weddell seals segregate in horizontal, vertical and hydrographic  
329 space from late summer into midwinter. The residency of males on the continental shelf, and the lack of  
330 pelagic diving, suggest that benthic and shallow under-ice habitats provide adequate prey resources to  
331 support this top predator. Whether by competition avoidance, or in search of “better” (more reliable,  
332 abundant, energetically profitable?) foraging opportunities, most of the females in our dataset left the  
333 shelf and moved north over the abyssal plain, supported by pelagic and epipelagic resources, before  
334 returning east and south towards shelf areas. These movements are associated with access to different  
335 hydrographic conditions, which are exploited via the diving patterns we have documented here. This

336 is the earliest evidence both of 1) sex-specific diving patterns in this monomorphic top predator, and  
337 of 2) their common reliance on the high-salinity shelf water masses unique to the southern Weddell  
338 Sea.

## 339 **7 Acknowledgements**

340 We would like to thank Marius Årthun, and the officers and crew of RRS Ernest Shackleton for  
341 their support during cruise ES054. Special thanks to Keith Nicholls for valuable input on Weddell  
342 Sea oceanography, and Mike Fedak for productive discussions on pinniped foraging strategies. The  
343 data collection was funded by NERC grants NE/G014833/1 and NE/G014086/1. TP was supported  
344 by a Royal Society Newton International Fellowship (NF170682). KH was supported by a Marie-  
345 Skłodowska Curie Research Fellowship. The oceanographic data were processed and made freely  
346 available by the International MEOP Consortium and the national programs that contribute to it.  
347 (<http://www.meop.net>).

## 348 **8 Author contributions**

349 TP and LB collected the data and conceived the study. TP, JP and KH developed the methods. TP  
350 carried out the analysis and wrote the manuscript. KH carried out the analysis in Supplementary  
351 Material S2. JP provided high level statistical support. All authors contributed critically to the  
352 manuscript and gave approval for publication.

## 353 **9 Ethics and permits**

354 Animal capture and handling protocols were reviewed and approved by the University of St Andrews  
355 Teaching and Research Ethics Committee (UTREC) and the Animal Welfare and Ethics Committee  
356 (AWEC) as part of the ethical review process. Permission to work in the Antarctic was granted under  
357 permit No.S7-4/2010 of the Antarctic Act 1994. Capture and deployment of satellite transmitters  
358 was carried out by experienced personnel with UK Animal (Scientific Procedures) Act 1986 Personal  
359 Licenses.

## 10 Availability of data and material

The dataset analysed for this article is available in a Zenodo repository at <http://doi.org/10.5281/zenodo.3820359> and R code for running the models can be found on GitHub at <https://github.com/theoniphotopoulou/emews>.

## 11 Competing interests

The authors declare that they have no competing interests.

## References

- [1] Thums M, Bradshaw CJA, Hindell MA. A validated approach for supervised dive classification in diving vertebrates. *Journal of Experimental Marine Biology and Ecology*. 2008;363:75–83.
- [2] Dragon AC, Bar-Hen A, Monestiez P, Guinet C. Horizontal and vertical movements as predictors of foraging success in a marine predator. *Marine Ecology Progress Series*. 2012;447:243–257.
- [3] Woodson CB, Litvin SY. Ocean fronts drive marine fishery production and biogeochemical cycling. *Proceedings of the National Academy of Sciences*. 2015;112(6):1710–1715.
- [4] Benoit-Bird KJ, Moline MA, Southall BL. Prey in oceanic sound scattering layers organize to get a little help from their friends. *Limnology and Oceanography*. 2017;62(6):2788–2798.
- [5] Abrahms B, Scales KL, Hazen EL, Bograd SJ, Schick RS, Robinson PW, et al. Mesoscale activity facilitates energy gain in a top predator. *Proceedings of the Royal Society B: Biological Sciences*. 2018;285(1885):20181101.
- [6] Charrassin JB, Bost CA. Utilisation of the oceanic habitat by king penguins over the annual cycle. *Marine Ecology Progress Series*. 2001;221:285–298.
- [7] Biuw M, Boehme L, Guinet C, Hindell M, Costa D, Charrassin JB, et al. Variations in behavior and condition of a Southern Ocean top predator in relation to in situ oceanographic conditions. *Proceedings of the National Academy of Sciences of the United States of America*. 2007;104(34):13705–10.
- [8] Baird RW, Webster DL, Schorr GS, McSweeney DJ, Barlow J. Diel variation in beaked whale diving behavior. *Marine Mammal Science*. 2008;24(3):630–642.

- 385 [9] Biuw M, Nøst O, Stien A, Zhou Q, Lydersen C, Kovacs K. Effects of hydrographic variability on  
386 the spatial, seasonal and diel diving patterns of southern elephant seals in the eastern Weddell  
387 Sea. PloS one. 2010;5(11):1–14.
- 388 [10] Heerah K, Hindell MA, Guinet C, Charrassin JB. From high-resolution to low-resolution dive  
389 datasets: a new index to quantify the foraging effort of marine predators. Animal Biotelemetry.  
390 2015;3(1):1–12.
- 391 [11] Labrousse S, Vacquié-Garcia J, Heerah K, Guinet C, Sallée JB, Authier M, et al. Winter use of  
392 sea ice and ocean water mass habitat by southern elephant seals: The length and breadth of the  
393 mystery. Progress in Oceanography. 2015;137:52 – 68.
- 394 [12] Naito Y, Costa DP, Adachi T, Robinson PW, Peterson SH, Mitani Y, et al. Oxygen minimum  
395 zone: An important oceanographic habitat for deep-diving northern elephant seals, *Mirounga*  
396 *angustirostris*. Ecology and Evolution. 2017;7(16):6259–6270.
- 397 [13] Gordine SA, Fedak MA, Boehme L. The importance of Southern Ocean frontal systems for the  
398 improvement of body condition in southern elephant seals. Aquatic Conservation: Marine and  
399 Freshwater Ecosystems. 2019;29(S1):283–304.
- 400 [14] O’Toole MD, Lea MA, Guinet C, Schick R, Hindell MA. Foraging strategy switch of a top marine  
401 predator according to seasonal resource differences. Frontiers in Marine Science. 2015;2:21.
- 402 [15] Nicholls KW, Boehme L, Biuw M, Fedak MA. Wintertime ocean conditions over the southern  
403 Weddell Sea continental shelf, Antarctica. Geophysical Research Letters. 2008;35(21).
- 404 [16] Mitani Y, Watanabe Y, Sato K, Cameron MF, Naito Y. 3D diving behavior of Weddell seals with  
405 respect to prey accessibility and abundance. Marine Ecology Progress Series. 2004;281:275–281.
- 406 [17] Williams TM, Davis RW, Fuiman LA, Francis J, Le Boeuf BJ, Horning M, et al. Sink or Swim:  
407 Strategies for Cost-Efficient Diving by Marine Mammals. Science. 2000;288(5463):133–136.
- 408 [18] Sparling CE, Fedak MA, Thompson D. Eat now, pay later? Evidence of deferred food-processing  
409 costs in diving seals. Biology Letters. 2007;3(1):95–99.
- 410 [19] Fuiman LA, Madden KM, Williams TM, Davis RW. Structure of foraging dives by Weddell seals  
411 at an offshore isolated hole in the Antarctic fast-ice environment. Deep Sea Research Part II:  
412 Topical Studies in Oceanography. 2007;54(3-4):270–289.

- 413 [20] Heerah K, Hindell M, Guinet C, Charrassin JB. A new method to quantify within dive foraging  
414 behaviour in marine predators. *PloS One*. 2014;9(6):e99329.
- 415 [21] Heerah K, Cox SL, Blevin P, Charrassin JB. Validation of Dive Foraging Indices Using Archived  
416 and Transmitted Acceleration Data: The Case of the Weddell Seal. *Frontiers in Ecology and*  
417 *Evolution*. 2019;7(30):1–15.
- 418 [22] Raymond B, Lea MA, Patterson T, Andrews-Goff V, Sharples R, Charrassin JB, et al. Important  
419 marine habitat off east Antarctica revealed by two decades of multi-species predator tracking.  
420 *Ecography*. 2015;38(2):121–129.
- 421 [23] Scales KL, Miller PI, Ingram SN, Hazen EL, Bograd SJ, Phillips RA. Identifying predictable  
422 foraging habitats for a wide-ranging marine predator using ensemble ecological niche models.  
423 *Diversity and Distributions*. 2016;22(2):212–224.
- 424 [24] Sequeira AMM, Rodríguez JP, Eguíluz VM, Harcourt R, Hindell M, Sims DW, et al. Convergence  
425 of marine megafauna movement patterns in coastal and open oceans. *Proceedings of the National*  
426 *Academy of Sciences*. 2018;115(12):3072–3077.
- 427 [25] Reisinger RR, Raymond B, Hindell MA, Bester MN, Crawford RJM, Davies D, et al. Habi-  
428 tat modelling of tracking data from multiple marine predators identifies important areas in the  
429 Southern Indian Ocean. *Diversity and Distributions*. 2018;24(4):535–550.
- 430 [26] Saijo D, Mitani Y, Abe T, Sasaki H, Goetsch C, Costa DP, et al. Linking mesopelagic prey  
431 abundance and distribution to the foraging behavior of a deep-diving predator, the northern  
432 elephant seal. *Deep Sea Research Part II: Topical Studies in Oceanography*. 2017;140:163 – 170.
- 433 [27] Treasure AM, Roquet F, Ansorge IJ, Bester MN, Boehme L, Bornemann H, et al. Marine mam-  
434 mals exploring the oceans pole to pole: a review of the MEOP consortium. *Oceanography*.  
435 2017;30(2):132–138.
- 436 [28] Harcourt R, Sequeira AMM, Zhang X, Roquet F, Komatsu K, Heupel M, et al. Animal-Borne  
437 Telemetry: An Integral Component of the Ocean Observing Toolkit. *Frontiers in Marine Science*.  
438 2019;6:326.
- 439 [29] Bestley S, Jonsen ID, Hindell MA, Harcourt RG, Gales NJ. Taking animal tracking to new  
440 depths: synthesizing horizontal–vertical movement relationships for four marine predators. *Ecol-*  
441 *ogy*. 2015;96(2):417–427.



- [30] Hindell MA, McMahon CR, Bester MN, Boehme L, Costa D, Fedak MA, et al. Circumpolar habitat use in the southern elephant seal: implications for foraging success and population trajectories. *Ecosphere*. 2016;7(5):e01213.
- [31] Nicholls KW, Østerhus S, Makinson K, Gammelsrød T, Fahrbach E. Ice-ocean processes over the continental shelf of the southern Weddell Sea, Antarctica: A review. *Reviews of Geophysics*. 2009;47(3).
- [32] Purkey SG, Smethie WM, Gebbie G, Gordon AL, Sonnerup RE, Warner MJ, et al. A Synoptic View of the Ventilation and Circulation of Antarctic Bottom Water from Chlorofluorocarbons and Natural Tracers. *Annual Review of Marine Science*. 2018;10(1):503–527.
- [33] Vernet M, Geibert W, Hoppema M, Brown PJ, Haas C, Hellmer HH, et al. The Weddell Gyre, Southern Ocean: Present Knowledge and Future Challenges. *Reviews of Geophysics*. 2019;57(3):623–708.
- [34] Kooyman G. A comparison between day and night diving in the Weddell seal. *Journal of Mammalogy*. 1975;56(3):563–574.
- [35] Kooyman G, Ponganis P. The physiological basis of diving to depth: birds and mammals. *Annual Review of Physiology*. 1998;60(1):19–32.
- [36] Heerah K, Andrews-Goff V, Williams G, Sultan E, Hindell M, Patterson T, et al. Ecology of Weddell seals during winter: Influence of environmental parameters on their foraging behaviour. *Deep Sea Research Part II: Topical Studies in Oceanography*. 2013;88-89:23 – 33.
- [37] Shero MR, Goetz KT, Costa DP, Burns JM. Temporal changes in Weddell seal dive behavior over winter: Are females increasing foraging effort to support gestation? *Ecology and Evolution*. 2018;8(23):11857–11874.
- [38] Plötz J, Bornemann H, Knust R, Schröder A, Bester M. Foraging behaviour of Weddell seals, and its ecological implications. *Polar Biology*. 2001;24(12):901–909.
- [39] McIntyre T, Stansfield L, Bornemann H, Plötz J, Bester M. Hydrographic influences on the summer dive behaviour of Weddell seals (*Leptonychotes weddellii*) in Atka Bay, Antarctica. *Polar Biology*. 2013;36(11):1693–1700.

- [40] Nachtsheim DA, Ryan S, Schröder M, Jensen L, Oosthuizen WC, Bester MN, et al. Foraging behaviour of Weddell seals (*Leptonychotes weddellii*) in connection to oceanographic conditions in the southern Weddell Sea. *Progress in Oceanography*. 2019;173:165 – 179.
- [41] Watanabe Y, Bornemann H, Liebsch N, Plötz J, Sato K, Naito Y, et al. Seal-mounted cameras detect invertebrate fauna on underside of Antarctic ice shelf. *Marine Ecology Progress Series*. 2006;309:297–300.
- [42] Liebsch N, Wilson RP, Bornemann H, Adelung D, Plötz J. Mouthing off about fish capture: Jaw movement in pinnipeds reveals the real secrets of ingestion. *Deep Sea Research Part II: Topical Studies in Oceanography*. 2007;54(3):256 – 269.
- [43] Naito Y, Bornemann H, Takahashi A, McIntyre T, Plötz J. Fine-scale feeding behavior of Weddell seals revealed by a mandible accelerometer. *Polar Science*. 2010;4(2):309 – 316.
- [44] Langrock R, King R, Matthiopoulos J, Thomas L, Fortin D, Morales JM. Flexible and practical modeling of animal telemetry data: hidden Markov models and extensions. *Ecology*. 2012;93(11):2336–2342.
- [45] Zucchini W, MacDonald IL, Langrock R. Hidden Markov models for time series: an introduction using R. Chapman and Hall/CRC; 2017.
- [46] Langrock R, Marques Ta, Baird RW, Thomas L. Modeling the Diving Behavior of Whales: A Latent-Variable Approach with Feedback and Semi-Markovian Components. *Journal of Agricultural, Biological, and Environmental Statistics*. 2014;19(1):82–100.
- [47] DeRuiter SL, Langrock R, Skirbutas T, Goldbogen JA, Calambokidis J, Friedlaender AS, et al. A multivariate mixed hidden Markov model for blue whale behaviour and responses to sound exposure. *The Annals of Applied Statistics*. 2017;11(1):362–392.
- [48] Michelot T, Langrock R, Bestley S, Jonsen ID, Photopoulou T, Patterson TA. Estimation and simulation of foraging trips in land-based marine predators. *Ecology*. 2017;98(7):1932–1944.
- [49] van Beest FM, Mews S, Elkenkamp S, Schuhmann P, Tsolak D, Wobbe T, et al. Classifying grey seal behaviour in relation to environmental variability and commercial fishing activity - a multivariate hidden Markov model. *Scientific Reports*. 2019;9(1):5642.

- [50] Ngô MC, Heide-Jørgensen MP, Ditlevsen S. Understanding narwhal diving behaviour using Hidden Markov Models with dependent state distributions and long range dependence. *PLoS computational biology*. 2019;15(3).
- [51] Langley I, Fedak M, Nicholls K, Boehme L. Sex-related differences in the postmolt distribution of Weddell seals (*Leptonychotes weddellii*) in the southern Weddell Sea. *Marine Mammal Science*. 2018;34(2):403–419.
- [52] Boehme L, Lovell P, Biuw M, Roquet F, Nicholson J, Thorpe S, et al. Technical Note: Animal-borne CTD-Satellite Relay Data Loggers for real-time oceanographic data collection. *Ocean Science*. 2009;5(4):685–695.
- [53] Photopoulou T, Fedak MA, Matthiopoulos J, McConnell B, Lovell P. The generalized data management and collection protocol for Conductivity-Temperature-Depth Satellite Relay Data Loggers. *Animal Biotelemetry*. 2015;3(1):21.
- [54] Argos. Argos User’s Manual:Worldwide tracking and environmental monitoring by satellite; 2016.
- [55] Årthun M, Nicholls KW, Makinson K, Fedak MA, Boehme L. Seasonal inflow of warm water onto the southern Weddell Sea continental shelf, Antarctica. *Geophysical Research Letters*. 2012;39(17).
- [56] Boehme L, Baker A, Fedak M, Årthun M, Nicholls K, Robinson P, et al. Bimodal winter haul-out patterns of adult Weddell seals (*Leptonychotes weddellii*) in the Southern Weddell Sea. *PLOS ONE*. 2016;11(5):1–19.
- [57] Jonsen I, Patterson T. foieGras: Fit Continuous-Time State-Space and Latent Variable Models for Filtering Argos Satellite (and Other) Telemetry Data and Estimating Movement Behaviour. CRAN; 2019. R package version 0.4.01. Available from: <https://cran.r-project.org/package=foieGras>.
- [58] Photopoulou T, Lovell P, Fedak MA, Thomas L, Matthiopoulos J. Efficient abstracting of dive profiles using a broken-stick model. *Methods in Ecology and Evolution*. 2015;6(3):278–288.
- [59] Watanabe Y, Mitani Y, Sato K, Cameron MF, Naito Y. Dive depths of Weddell seals in relation to vertical prey distribution as estimated by image data. *Marine Ecology Progress Series*. 2003;252:283–288.

- 523 [60] R Core Team. R: A Language and Environment for Statistical Computing. Vienna, Austria; 2019.  
524 Available from: <https://www.R-project.org/>.
- 525 [61] Harcourt R, Kingston J, Waas JR, Hindell MA, et al. Foraging while breeding: alternative mating  
526 strategies by male Weddell seals? Aquatic conservation. 2008;17:S68.
- 527 [62] Ekau W. Demersal fish fauna of the Weddell Sea, Antarctica. Antarctic Science. 1990;2(2):129–  
528 137.
- 529 [63] Bailleul F, Charrassin JB, Ezraty R, Girard-Arduin F, McMahon CR, Field IC, et al. South-  
530 ern elephant seals from Kerguelen Islands confronted by Antarctic Sea ice. Changes in move-  
531 ments and in diving behaviour. Deep Sea Research Part II: Topical Studies in Oceanography.  
532 2007;54(3):343–355. Available from: [http://www.sciencedirect.com/science/article/pii/](http://www.sciencedirect.com/science/article/pii/S096706450700015X)  
533 [S096706450700015X](http://www.sciencedirect.com/science/article/pii/S096706450700015X).
- 534 [64] Garrison DL, Close AR. Winter ecology of the sea ice biota in Weddell Sea pack ice. Mar Ecol  
535 Prog Ser. 1993;96:17–31.
- 536 [65] Jenkins A, Dutrieux P, Jacobs S, Steig EJ, Gudmundsson GH, Smith J, et al. Decadal Ocean  
537 Forcing and Antarctic Ice Sheet Response: Lessons From The Amundsen Sea. Oceanography.  
538 2016;29(4):106–117. Available from: <http://www.jstor.org/stable/24862286>.
- 539 [66] Christensen V. Ecosystem maturity—towards quantification. Ecological modelling. 1995;77(1):3–  
540 32.
- 541 [67] Riotte-Lambert L, Matthiopoulos J. Environmental predictability as a cause and consequence of  
542 animal movement. Trends in ecology & evolution. 2019;.
- 543 [68] Goetz KT, Burns JM, Hückstädt LA, Shero MR, Costa DP. Temporal variation in isotopic  
544 composition and diet of Weddell seals in the western Ross Sea. Deep Sea Research Part II:  
545 Topical Studies in Oceanography. 2017;140:36–44.
- 546 [69] Fuiman L, Davis R, Williams T. Behavior of midwater fishes under the Antarctic ice: observations  
547 by a predator. Marine Biology. 2002;140(4):815–822.
- 548 [70] Davis RW, Fuiman LA, Williams TM, Horning M, Hagey W. Classification of Weddell seal dives  
549 based on 3 dimensional movements and video-recorded observations. Marine Ecology Progress  
550 Series. 2003;264:109–122.

<sup>551</sup> [71] Kooyman GL. Weddell Seal: Consummate Diver. Cambridge University Press; 1981.
